# Supplementary material for: Potential clinical applications of exosomes in the diagnosis, treatment, and prognosis of cardiovascular diseases: a narrative review
Source: PubMed Central journal article supplement — Ann Transl Med. 2022 Mar;10(6):372. doi: 10.21037/atm-22-619 (PMC9011294; doi:10.21037/atm-22-619), 2022-03
Supplement: atm-10-06-372-supplementary.pdf [file atm-10-06-372-supplementary.pdf]

**Table S1** Detailed search strategy of one database as an example (database: PubMed)

| Items                         | Specification                                                                                                                                                                                                                              |
|-------------------------------|--------------------------------------------------------------------------------------------------------------------------------------------------------------------------------------------------------------------------------------------|
| 1. Open the website of PubMed | pubmed.ncbi.nlm.nih.gov                                                                                                                                                                                                                    |
| 2. Search with keywords       | Keywords: exosome, cardiovascular disease, biomarker, clinical trial, therapy; combination with “AND”, “OR”                                                                                                                                |
| 3. Filters                    | No filters with “results by year”, “text availability”, “article attribute”, or “article type”, “publication date” on the left column, except for “English” was selected in “language” (those columns are on the left side of the website) |
| 4. Get the results            | –                                                                                                                                                                                                                                          |
